# Supplementary material for: ImmuneBuilder: Deep-Learning models for predicting the structures of immune proteins
Source: PubMed Central journal article supplement (PMC10227038; doi:10.1038/s42003-023-04927-7), 2023-05-29
Supplement: 42003_2023_4927_MOESM3_ESM.pdf [file 42003_2023_4927_MOESM3_ESM.pdf]

## Description of Additional Supplementary Files

**File name:** Supplementary Data 1

**Description:** RMSD values for each CDR loop for each method benchmarked on antibody structure prediction.

**File name:** Supplementary Data 2

**Description:** RMSD values for each CDR loop for each method benchmarked on nanobody structure prediction.

**File name:** Supplementary Data 3

**Description:** RMSD values for each CDR loop for each method benchmarked on TCR structure prediction.

**File name:** Supplementary Data 4

**Description:** Data to replicate Figure 3 from the manuscript.
